# Supplementary material
Source: publisher figshare collection journal article supplement (https://acs.figshare.com/ndownloader/files/5117842)

Figure S1. AFM image of an as-prepared 8-layer titanium phosphate films prepared by replacing PS-1 solution with 0.1 M  $\text{H}_2\text{SO}_4$ . 10 mM  $\text{Ti}(\text{SO}_4)_2$  aqueous solution with the addition of 0.1 M  $\text{H}_2\text{SO}_4$  and PS-2 solution with a pH of 4.0 was used for the preparation of the titanium phosphate films.

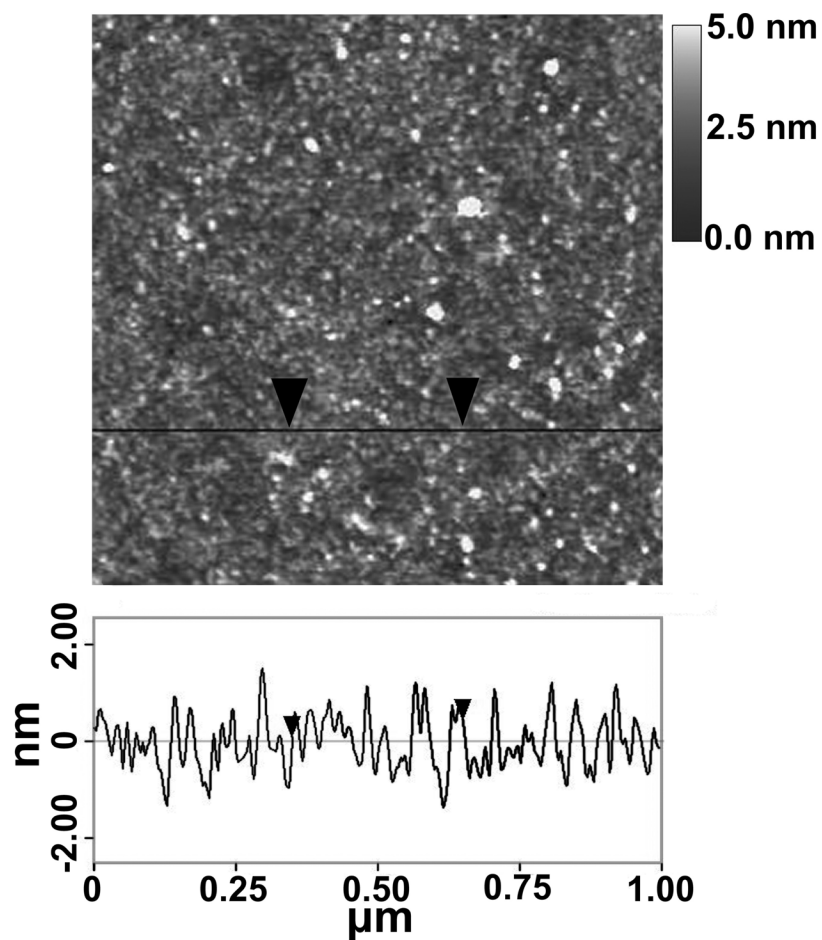

Figure S2. QCM frequency decrease ( $-\Delta F$ ) of successive growth of zirconium phosphate films.

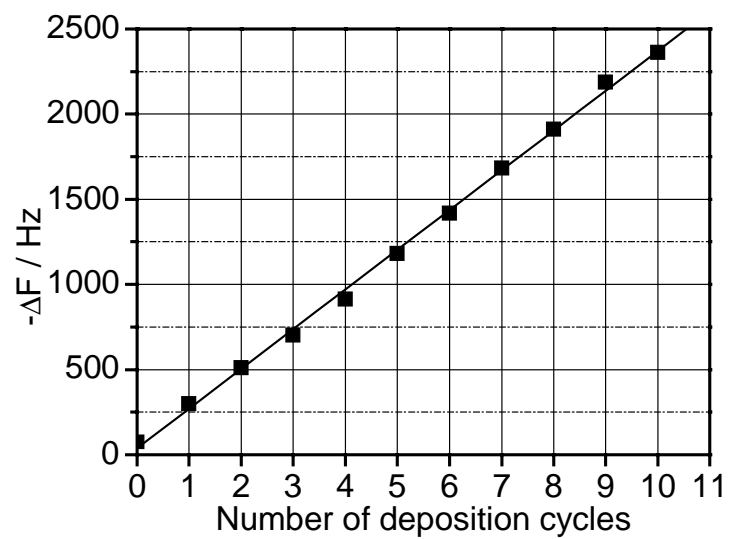

Figure S3. XPS spectrum of the as-prepared zirconium phosphate film

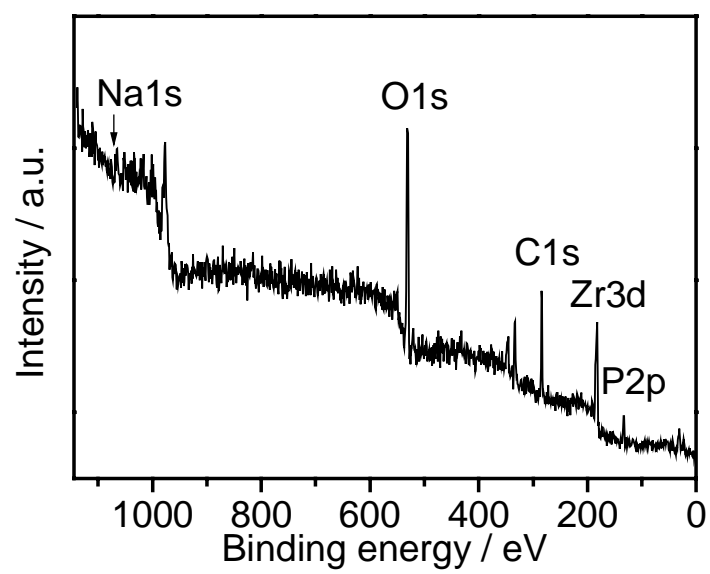

Figure S4. SEM image of the as-prepared zirconium phosphate films deposited on Ag-coated quartz crystal resonator.

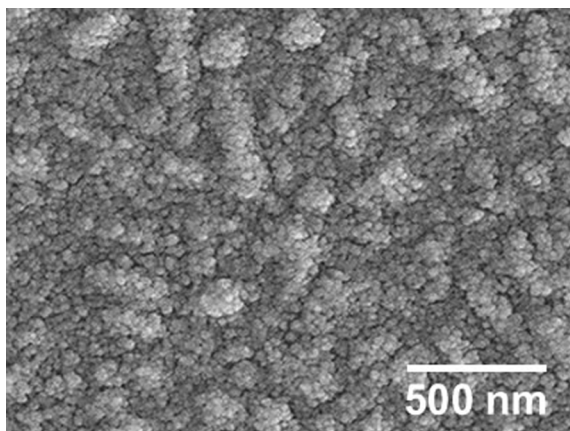

Supplement: Supplementary file 1 [file 5117842]
